# Supplementary material for: Characteristics of Patients Treated with JAK Inhibitors in Rheumatoid Arthritis before versus after VTE Risk Warnings
Source: MDPI journal article supplement (doi:10.3390/jcm12010207), 2022-12-27

Supplementary material

**Characteristics of patients treated with JAK inhibitors in rheumatoid arthritis before versus after VTE risk warnings.**

**Supplemental Table S1. Characteristics of the patients according to treatment, before imputation.**

| Parameters                                            | Baricitinib<br>n = 155 | Tofacitinib<br>n = 77 |
|-------------------------------------------------------|------------------------|-----------------------|
| <b>Patients baseline characteristics</b>              |                        |                       |
| Women                                                 | 118/155 (76.1)         | 51/77 (66.2)          |
| Age (years), mean $\pm$ SD                            | 59.6 $\pm$ 14.2        | 56.7 $\pm$ 13.4       |
| BMI (kg/m <sup>2</sup> ) <sup>1</sup> , mean $\pm$ SD | 27.0 $\pm$ 5.9         | 27.1 $\pm$ 6.0        |
| Smoking status                                        |                        |                       |
| Non-smoker                                            | 62/106 (58.5)          | 22/57 (46.8)          |
| Former smoker                                         | 22/106 (20.8)          | 12/57 (25.5)          |
| Current smoker                                        | 22/106 (20.8)          | 13/57 (27.7)          |
| <b>Rheumatoid arthritis characteristics</b>           |                        |                       |
| RA duration (years) <sup>2</sup> , median (IQR)       | 11 (4 to 20)           | 11 (6 to 19)          |
| Seropositivity status                                 |                        |                       |
| RF + / ACPA +                                         | 122/154 (79.2)         | 54/76 (71.1)          |
| RF + / ACPA -                                         | 11/154 (7.1)           | 8/76 (10.5)           |
| RF - / ACPA +                                         | 8/154 (5.2)            | 7/76 (9.2)            |
| RF - / ACPA -                                         | 13/154 (8.4)           | 7/76 (9.2)            |
| Erosion presence                                      | 101/148 (68.2)         | 55/73 (75.3)          |
| Extra-articular involvement                           | 28/155 (18.1)          | 17/77 (22.1)          |
| Surgery related to RA                                 | 41/155 (26.5)          | 19/77 (24.7)          |
| Baseline CRP (mg/L) <sup>3</sup> , median (IQR)       | 7.0 (1.1 to 25.6)      | 9.9 (2.6 to 27.0)     |
| <b>Previous treatments</b>                            |                        |                       |
| Previous Methotrexate                                 | 140/155 (90.3)         | 67/77 (87.0)          |
| Previous TNF inhibitor                                | 117/155 (75.5)         | 59/77 (76.6)          |
| Previous bDMARD-OMA                                   | 107/155 (69.0)         | 53/77 (68.8)          |
| Prior bDMARD                                          |                        |                       |
| Naïve (0)                                             | 23/155 (14.8)          | 7/77 (9.1)            |
| 1 or 2                                                | 50/155 (32.3)          | 34/77 (44.2)          |
| 3 or more                                             | 82/155 (52.9)          | 36/77 (46.8)          |
| <b>Comorbidities of special interest</b>              |                        |                       |
| Arterial hypertension                                 | 48/155 (31.0)          | 28/77 (36.4)          |
| Diabetes                                              | 21/155 (13.5)          | 13/77 (16.9)          |
| Dyslipidemia                                          | 40/155 (25.8)          | 20/77 (26.0)          |
| Coronary heart disease                                | 11/155 (7.1)           | 6/77 (7.8)            |
| Peripheral artery disease                             | 7/155 (4.5)            | 2/77 (2.6)            |
| Stroke                                                | 11/155 (7.1)           | 6/77 (7.8)            |
| Permanent atrial fibrillation                         | 8/155 (5.2)            | 3/77 (3.9)            |
| Sleep apnea syndrome                                  | 14/155 (9.0)           | 4/77 (5.2)            |
| Pulmonary embolism                                    | 7/155 (4.5)            | 2/77 (2.6)            |
| Deep venous thrombosis                                | 8/155 (5.2)            | 3/77 (3.9)            |
| Neoplastic history                                    | 11/155 (7.1)           | 6/77 (7.8)            |
| Chronic obstructive pulmonary disease                 | 7/154 (4.5)            | 6/77 (7.8)            |
| Migraines                                             | 1/155 (0.6)            | 5/77 (6.5)            |
| Herpes zoster infections                              | 7/153 (4.6)            | 5/76 (6.6)            |
| <b>Other treatments at baseline</b>                   |                        |                       |
| Concomitant csDMARD                                   |                        |                       |
| None                                                  | 92/153 (60.1)          | 47/75 (62.7)          |
| Methotrexate                                          | 52/153 (34.0)          | 22/75 (29.3)          |
| Salazopyrine                                          | 0/153 (0.0)            | 3/75 (4.0)            |
| Leflunomide                                           | 7/153 (4.6)            | 3/75 (4.0)            |
| Hydroxychloroquine (plaquenil)                        | 2/153 (1.3)            | 0/75 (0.0)            |
| Prednisolone baseline                                 | 87/155 (56.1)          | 32/77 (41.6)          |
| Anticoagulant baseline                                | 6/155 (3.9)            | 4/77 (5.2)            |
| <b>Treatment characteristics</b>                      |                        |                       |
| JAK inhibitor posology                                |                        |                       |
| Classic RA posology                                   | 126/155 (81.3)         | 76/77 (98.7)          |

|                                                                                               |                |              |
|-----------------------------------------------------------------------------------------------|----------------|--------------|
| Reduced RA posology                                                                           | 29/155 (18.7)  | 1/77 (1.3)   |
| Introduction before May 2019                                                                  | 107/155 (69.0) | 54/77 (70.1) |
| <b>Treatment discontinuation</b>                                                              |                |              |
| Discontinuation                                                                               | 78/155 (50.3)  | 35/77 (45.5) |
| Reasons for discontinuation                                                                   |                |              |
| Primary inefficacy                                                                            | 24/78 (30.8)   | 14/35 (40.0) |
| Secondary inefficacy                                                                          | 24/78 (30.8)   | 7/35 (20.0)  |
| Adverse events                                                                                | 23/78 (29.4)   | 11/35 (31.4) |
| Other (pregnancy, lack of observance,<br>decompensation of comorbidities, no apparent reason) | 7/78 (9.0)     | 3/35 (8.6)   |

---

Values are no./total no. (%) unless otherwise stated. <sup>1</sup> 71 missing values (n=52 vs. 19) <sup>2</sup> 6 missing values (n=4 vs. 2) <sup>3</sup> 35 missing values (n=20 vs. 15)

Abbreviations: ACPA = anti-citrullinated protein antibody; bDMARD = biological disease-modifying antirheumatic drug; BMI = body mass index; CRP = C-reactive protein; csDMARD = conventional synthetic disease-modifying antirheumatic drug; IQR = interquartile range; OMA = other mechanism of action; RA = Rheumatoid arthritis; RF = rheumatoid factor; SD = standard deviation; TNF = tumor necrosis factor.

**Supplemental Figure S1. Study Flow chart.**

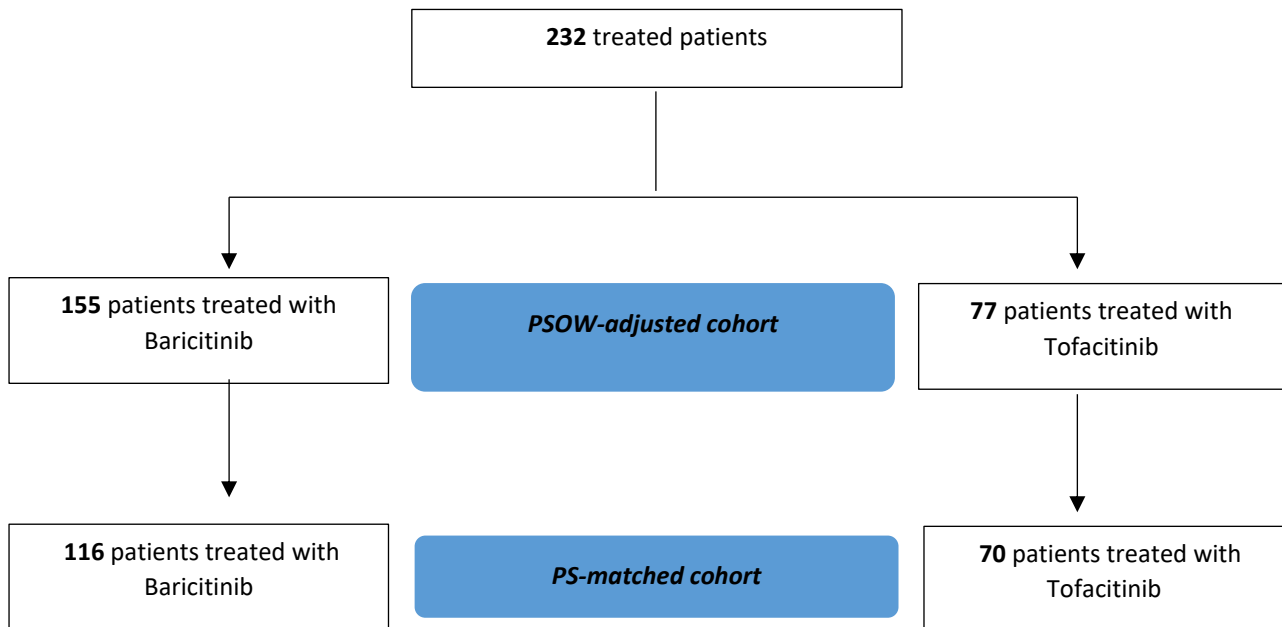

Abbreviations: PS = propensity score; PSOW = propensity score weighting using overlap weights.

**Supplemental Figure S2. Two-year follow-up treatment persistence, with vs. without concomitant csDMARD at baseline.**

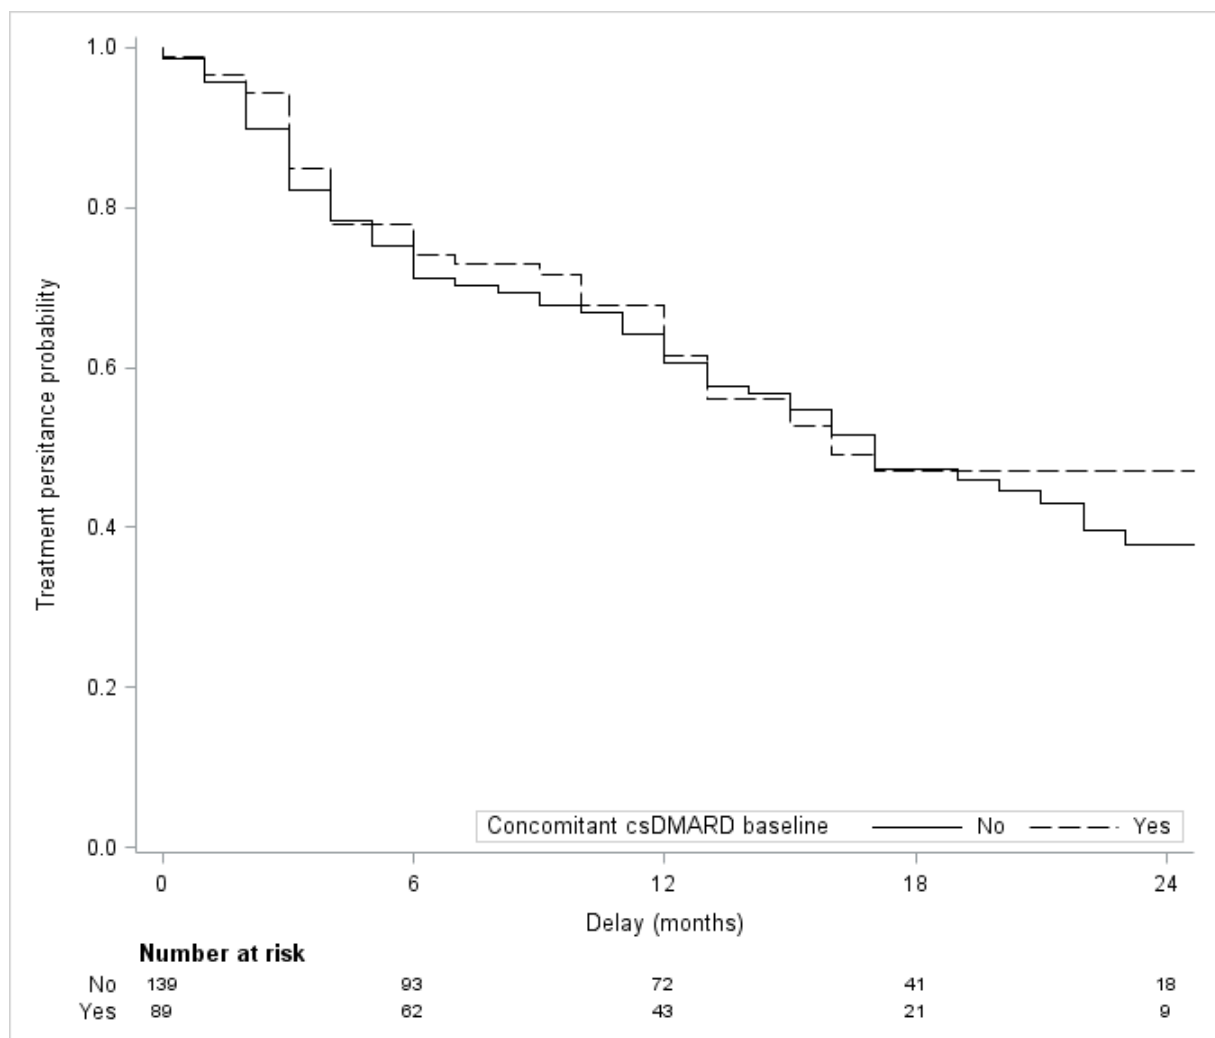

Supplemental Figure S3. Two-year follow-up treatment persistence depending on previous bDMARD status.

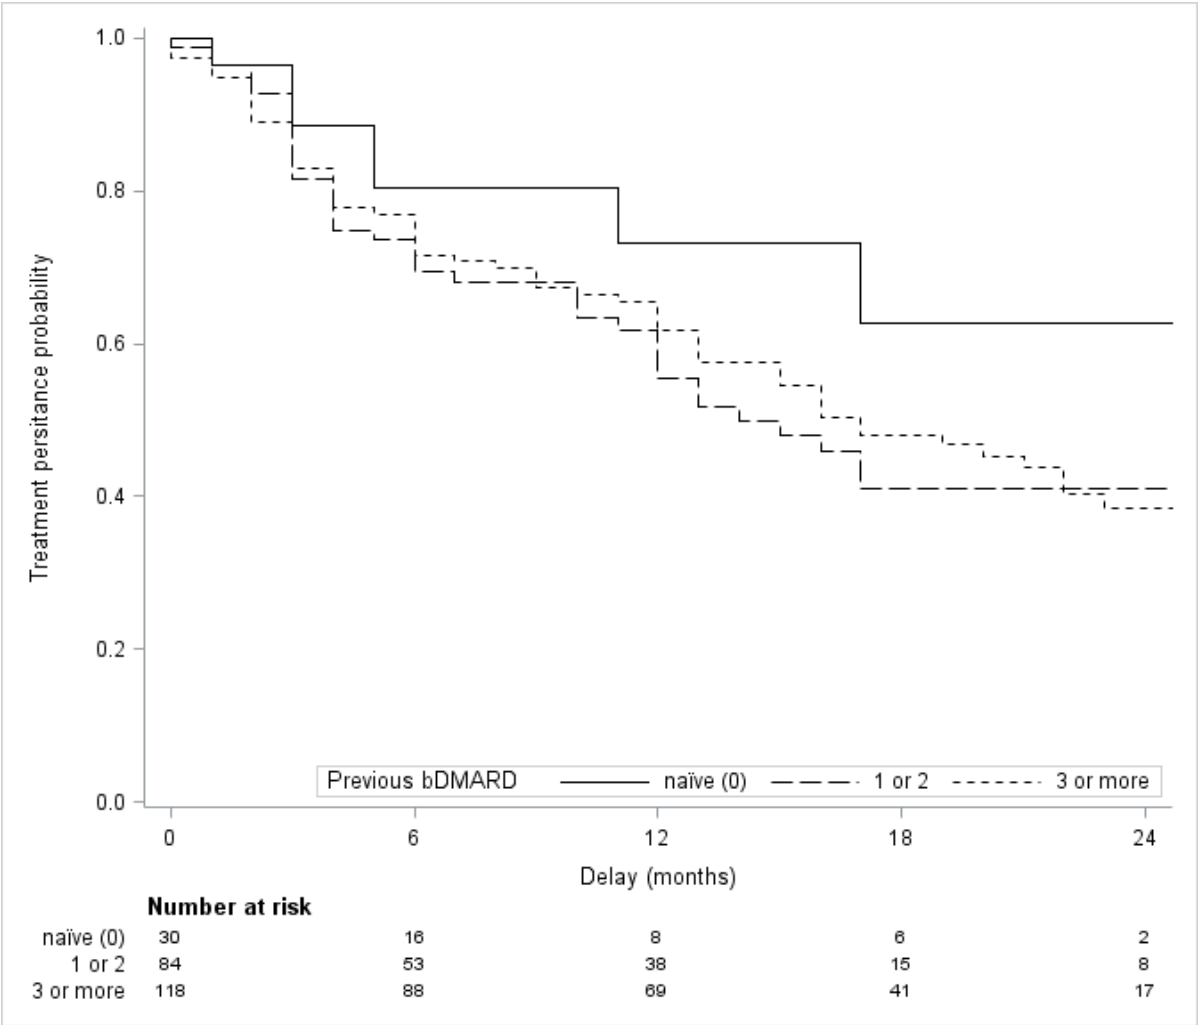

Supplement: s1 [file s1]
